# Supplementary material
Source: PubMed Central journal article supplement (PMC3749308)
Supplement: NIHMS474698-supplement-figs.pdf [file NIHMS474698-supplement-figs.pdf]

## Supplementary figure legends

### FIGURE S1: Eps8 interacts with the F-box protein Fbxw5

- (a) Flag-Fbxw5 and interacting proteins were enriched via anti-flag immunoprecipitation from five 15 cm dishes of transiently transfected HEK 293T cells followed by flag peptide elution. As a control, the IP was also performed from HEK 293T cells transfected with pCDNA3.1 vector. Flag-Fbxw5 and control immunoprecipitates were separated on a gradient gel and Coomassie stained.
- (b) IP fractions shown in (a) were subjected to mass spectrometry analysis. The table summarizes a selection of proteins specifically identified in the flag-Fbxw5 IP. Listed are proteins with a MASCOT protein score higher than 20.
- (c) Anti-Flag IPs were performed as in (a) from HEK 293T cells stably expressing flag-Fbxw5 and analyzed by immunoblotting with indicated antibodies.
- (d) Extracts from HeLa suspension cells (108 cells per sample) were subjected to IP using rabbit pre-immune serum or affinity-purified rabbit Fbxw5 antibodies, and analyzed by immunoblotting with indicated antibodies.
- (e) Extracts of HEK293T cells (five 10 cm dishes per sample) transiently transfected with pCDNA3.1 (control), pCDNA3.1-Flag-Fbxw5, or pCDNA3.1-Flag-Fbxw5 $\Delta$ F-box were subjected to anti-flag IP and analyzed by immunoblotting with indicated antibodies.

### FIGURE S2: Fbxw5 knock down increases steady state levels of Eps8

- (a) Immunoblot analysis of HeLa cells transfected with non-targeting siRNA (si nt) or siFbxw5#1,#3, or #4 for 42 h with indicated antibodies. 24 h after siRNA treatment, cells were treated with taxol or mock-treated with DMSO for 18 h.
- (b) Immunoblot analysis of HeLa cells transfected with non-targeting siRNA (si nt) or siRNAs targeting Fbxw5 (siFbxw5 #1-4) for 72 h with indicated antibodies. Eps8 levels were quantified relative to  $\alpha$ -tubulin levels; relative Eps8 levels of control cells set to 100 %.

\* cross-reactive band

### FIGURE S3: Flag-Fbxw5 $\Delta$ F-box interacts with components of CRL4 but not SCF complexes

- (a) Schematic representation of SCF and CRL4 complexes.
- (b) Extracts of HEK293T cells (five 10 cm dishes per sample) transiently transfected with pCDNA3.1 (control), pCDNA3.1-Flag-Fbxw5, or pCDNA3.1-

Flag-Fbxw5 $\Delta$ F-box were subjected to anti-flag IP and analyzed by immunoblotting with indicated antibodies. Same samples as in Supplementary Figure 1e, for reference the anti-flag immunoblot is shown again.

**FIGURE S4: Downregulation of Fbxw5 delays progression into metaphase but has no dramatic impact on the cytoplasmic or cortical actin cytoskeleton in pro-metaphase**

- (a) Z-stack maximum intensity projection of representative HeLa cells in prometaphase treated with non-targeting siRNA (si nt) or siRNA targeting Fbxw5 (si Fbxw5) for 72 h. Z-stack images (step with=0.25  $\mu$ M) of HeLa cells stably expressing Lifeact-GFP and H2B-RFP were taken and maximum intensity projection images were generated using ImageJ after deconvolution. Scale bar = 20  $\mu$ m
- (b) Stills from fluorescence time lapses of HeLa cells stably expressing  $\alpha$ -tub-GFP (green) and H2B-RFP (red) and transfected with si nt or si Fbxw5 #3. Scale bar = 10  $\mu$ m
- (c) Quantification of prometaphase duration (nuclear envelope breakdown - chromosome alignment in metaphase) in cells stably expressing  $\alpha$ -tub-GFP and H2B-RFP transfected with si nt or si Fbxw5 #3 (mean +/- standard deviation of 8 cells).
- (d) Quantification of prometaphase duration (nuclear envelope breakdown - chromosome alignment in metaphase) in HeLa cells stably expressing Lifeact-GFP and H2B-RFP transfected with si nt or si Fbxw5 #3 (mean +/- standard deviation of 25 cells).

**FIGURE S5: Downregulation of Fbxw5 or Eps8 does not significantly change the mitotic index**

- (a) HeLa cells were treated with non-targeting siRNA (si nt) or siRNAs targeting Fbxw5 (si Fbxw5 #3) for 72 h. Cells were fixed, stained with HOECHST and anti- $\alpha$ -tubulin and anti-g-tubulin antibodies. Representative images of different mitotic stages are depicted. Classification of mitotic stages shown in Fig. 4c was performed according to these pictures. Scale bar = 10  $\mu$ m.
- (b) Same experiment as shown in Figure 4a-c. The percentage of mitotic and interphase cells is shown (mean +/- s.e.m. of three independent experiments, ~1000 cells were counted per condition and experiment).

**FIGURE S6: Eps8 phosphorylation is not required for SCFFbxw5-mediated ubiquitylation, and phospho-mimicking and -deficient mutants of Fbxw5S151 exhibit no major changes in SCF complex formation, Eps8 binding, or ubiquitylation activity towards Eps8**

- (a) In vitro dephosphorylation of His-Eps8 (5  $\mu$ M) purified from SF9 cells with 10 U CIP ( + phosphatase) at 37°C for 1 h followed by immunoblotting.
- (b) In vitro ubiquitylation of +/-phosphatase-treated His-Eps8 (0.2 $\mu$ M) incubated with 75  $\mu$ M His-Ubiquitin, 170 nM Ube1, 1  $\mu$ M UbcH5b, 150 nM SCFFbxw5, and 5 mM ATP at 30°C for 30 and 60 min.
- (c) Extracts of HEK293T cells transiently transfected with pCDNA3.1 (control), pCDNA3.1-Flag-Fbxw5, pCDNA3.1-Flag-Fbxw5S151E or pCDNA3.1-Flag-Fbxw5S151A were subjected to anti-flag IP and analyzed by immunoblotting with indicated antibodies.
- (d) In vitro ubiquitylation reaction of His-Eps8 (0.2  $\mu$ M) with 75  $\mu$ M His-Ubiquitin, 170 nM Ube1, 1  $\mu$ M UbcH5b, 5 mM ATP, and control (= flag-IPs from non-transfected cells), flag-Fbxw5, flag-Fbxw5S151E or flag-Fbxw5S151A immunoprecipitates at 30°C. Reactions were stopped at indicated time points and analyzed by immunoblotting with indicated antibodies.

**FIGURE S7: Un-cropped blots of key experiments**

**a**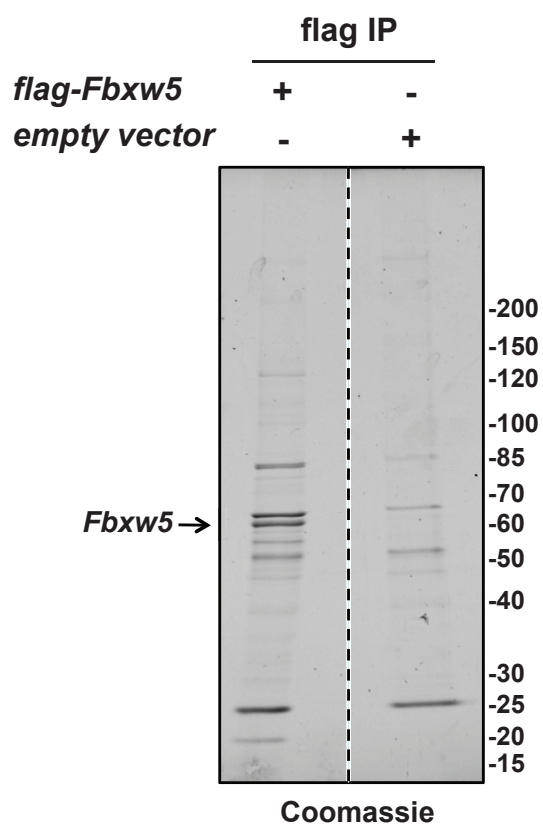**b**

| Protein   | Score | Peptides identified |
|-----------|-------|---------------------|
| Fbxw5     | 760   | 15                  |
| Cul1      | 510   | 16                  |
| Eps8      | 90    | 3                   |
| SGN1      | 78    | 3                   |
| SGN4      | 72    | 2                   |
| DDB1      | 22    | 1                   |
| Ubiquitin | 22    | 1                   |

**c**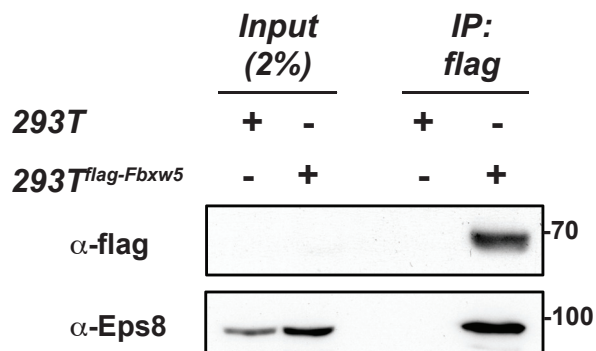**d**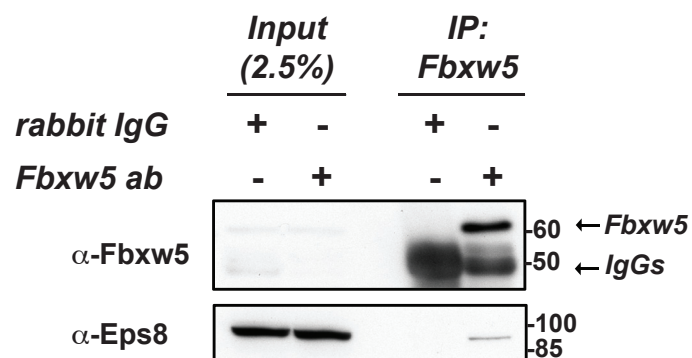**e**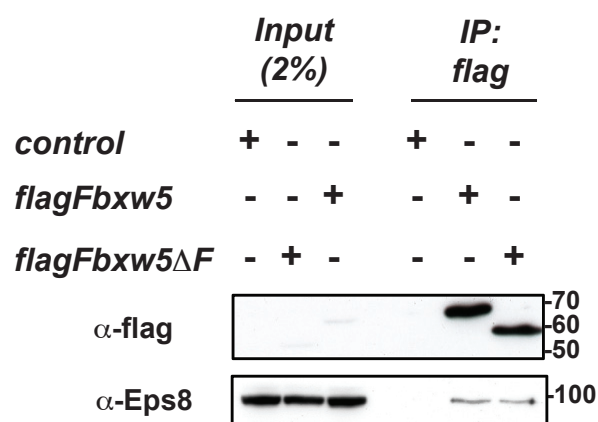

SUPPL FIGURE 1 (Melchior)

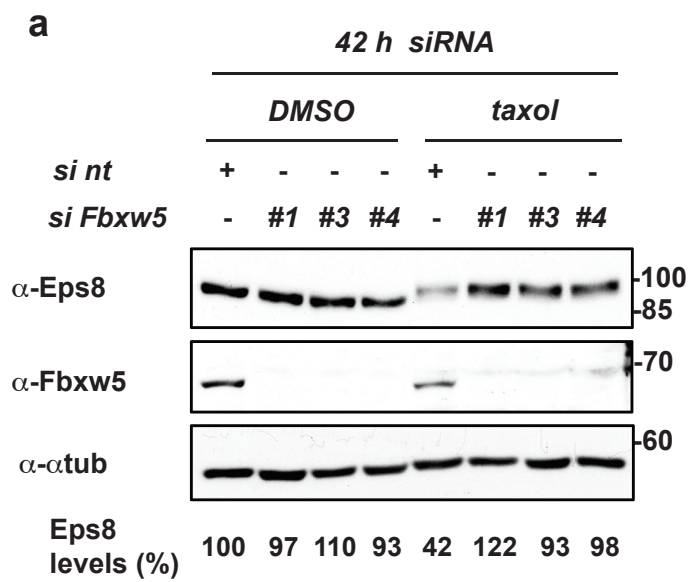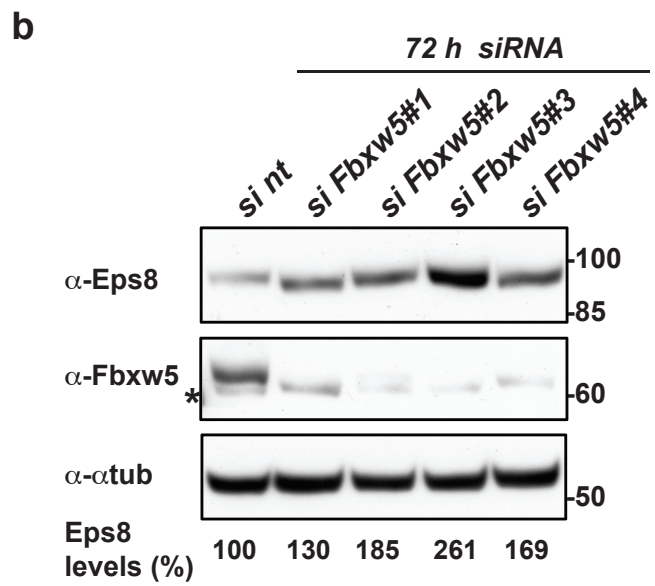

SUPPL FIGURE 2 (Melchior)

a

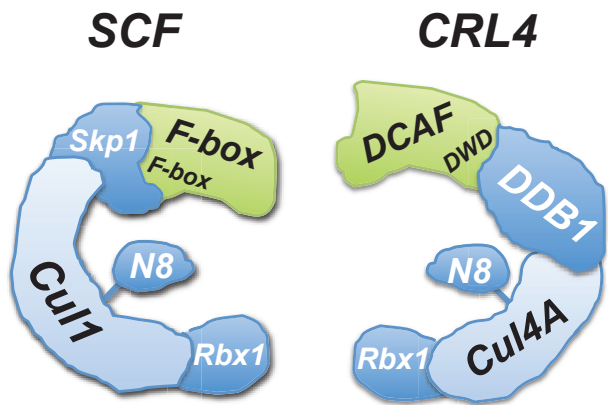

b

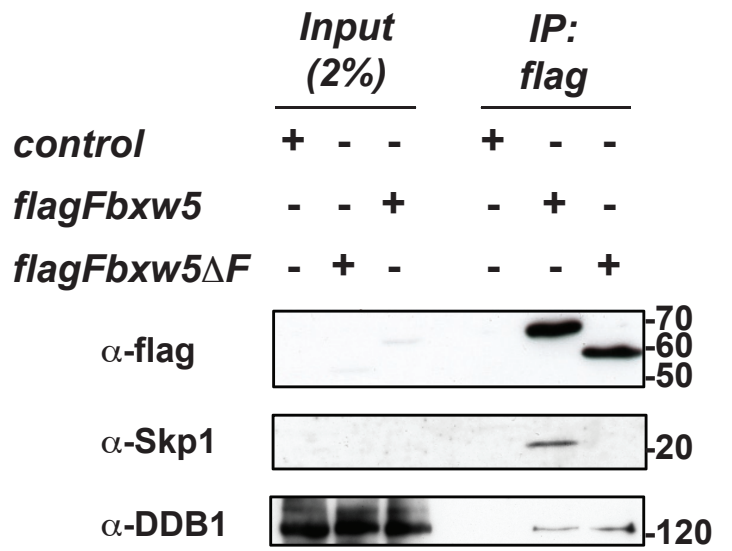

SUPPL FIGURE 3 (Melchior)

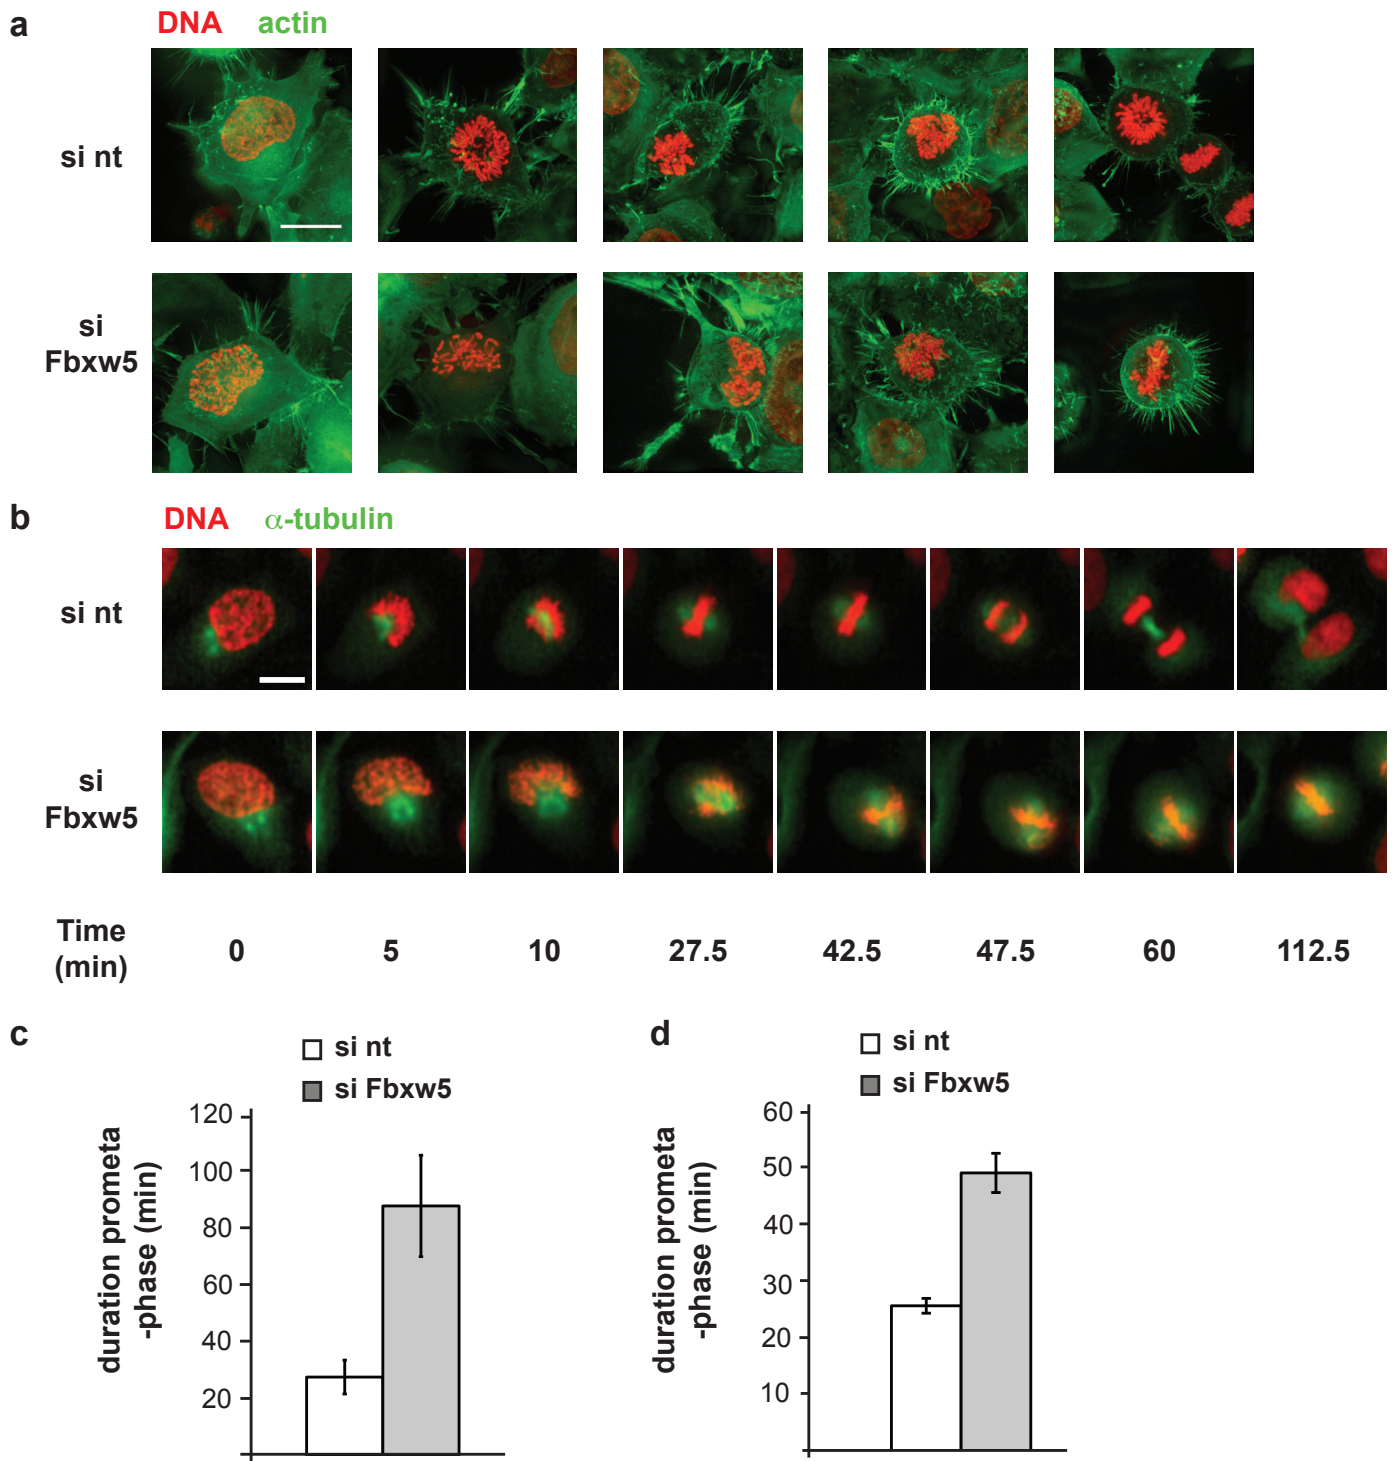

SUPPL FIGURE 4 (Melchior)

**a**

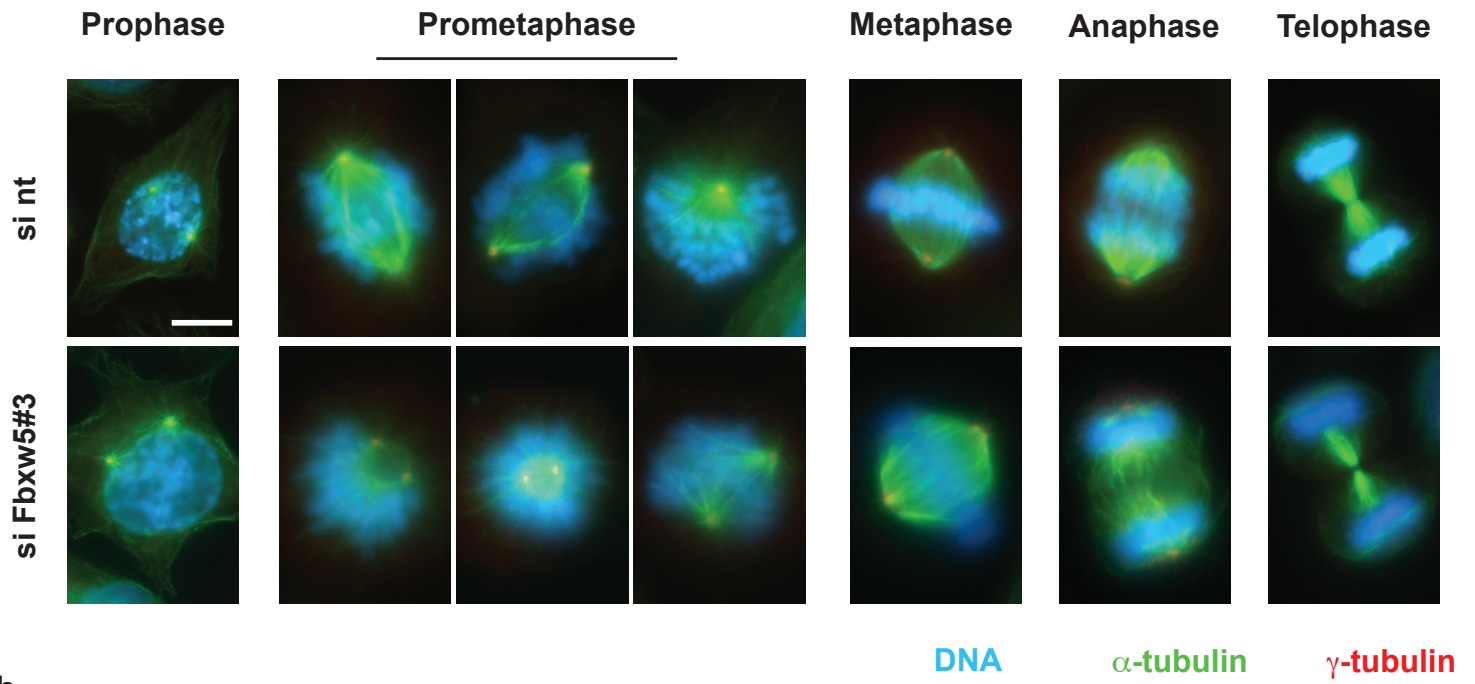

**b**

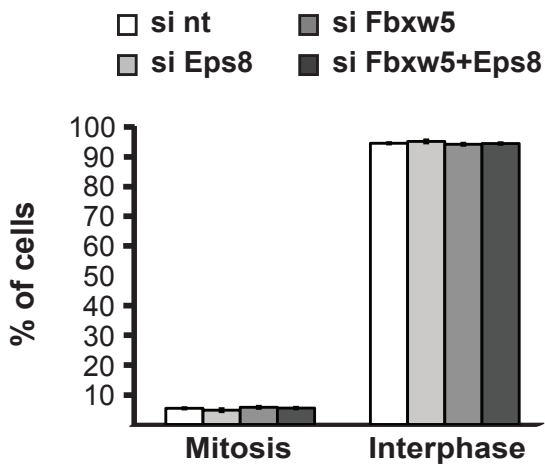

SUPPL FIGURE 5 (Melchior)



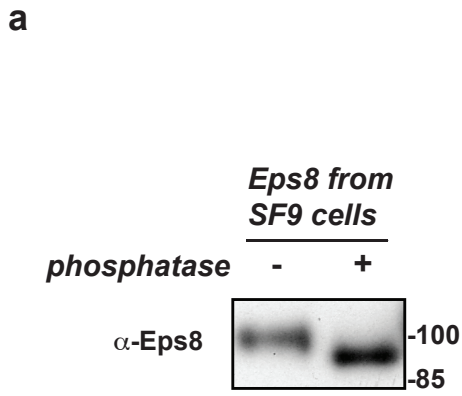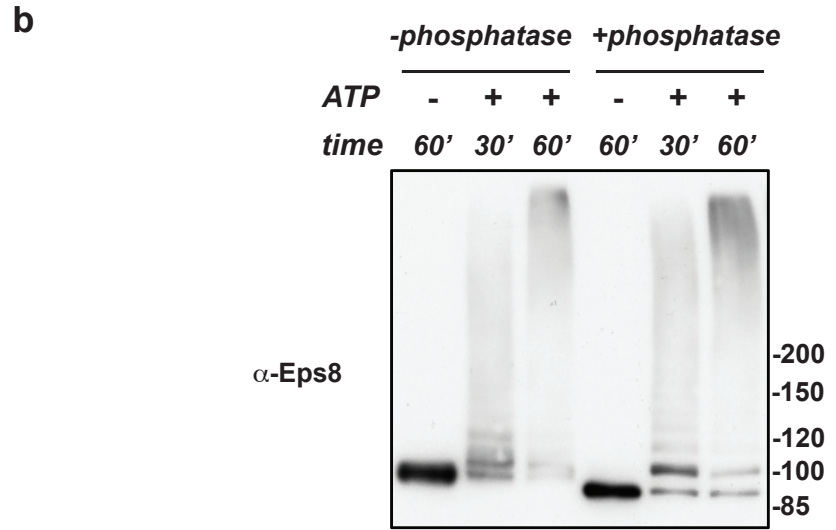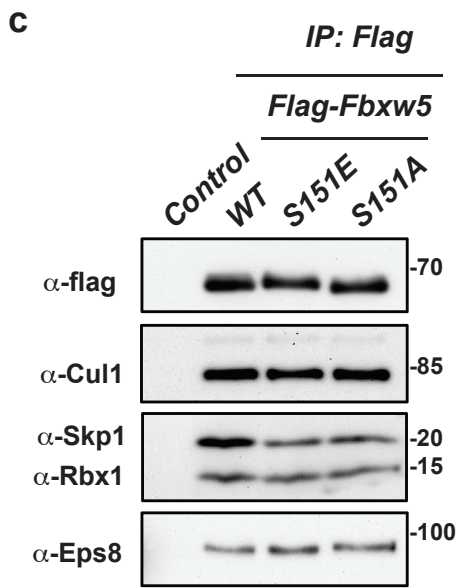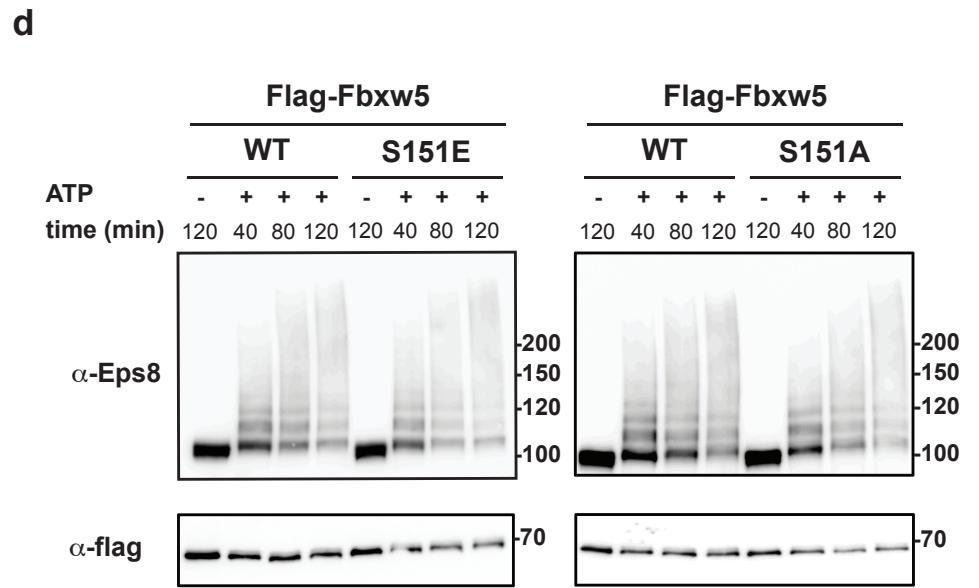

SUPPL FIGURE 6 (Melchior)

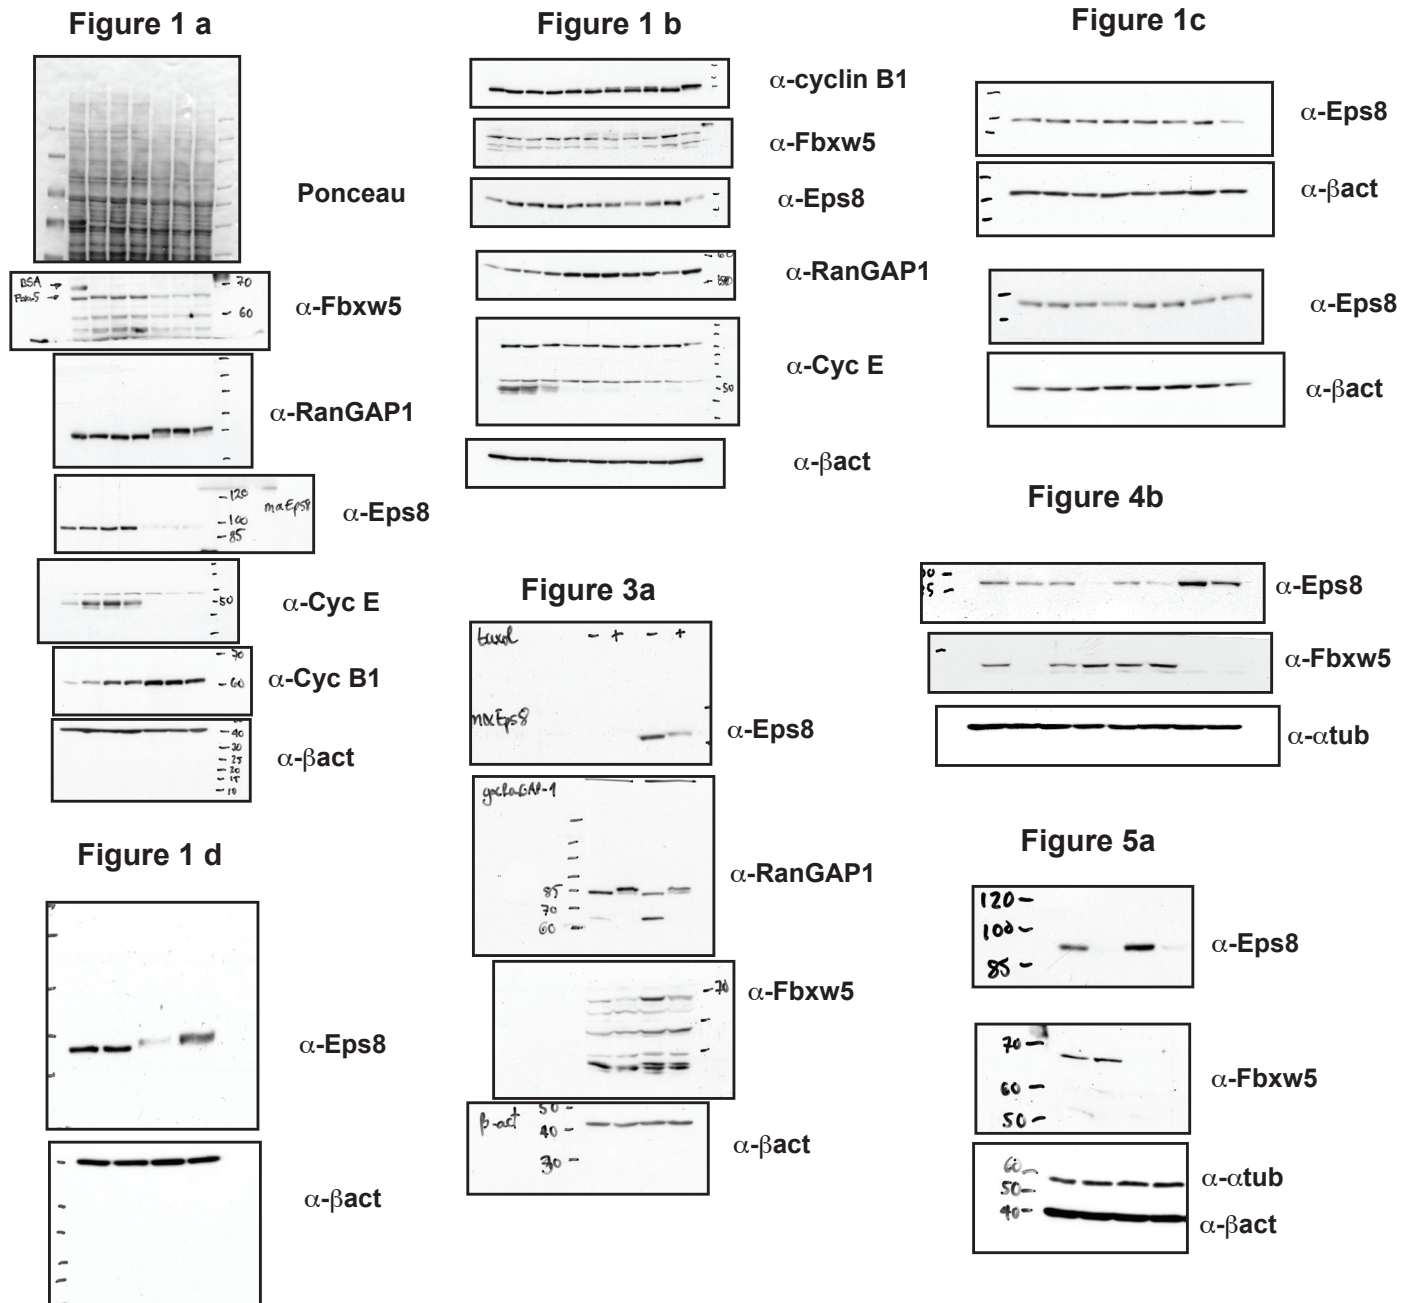

SUPPL FIGURE 7 (Melchior)
